# Supplementary material for: Targeting the Infant Gut Microbiota Through a Perinatal Educational Dietary Intervention: Protocol for a Randomized Controlled Trial
Source: PubMed Central journal article supplement (PMC6914305; doi:10.2196/14771), 2019-10-21
Supplement: resprot_v8i10e14771_app4.pdf [file resprot_v8i10e14771_app4.pdf]

## Multimedia Appendix 4. Intervention Logic Model

**Table A4.1: Intervention logic model describing the design features used to meet the intervention objectives**

|                                                   |                                                                                                                                                                                                                                                                                                                                                                                                                                                                                                                                                                                                                                                                                                                                                                                                                                                                               |
|---------------------------------------------------|-------------------------------------------------------------------------------------------------------------------------------------------------------------------------------------------------------------------------------------------------------------------------------------------------------------------------------------------------------------------------------------------------------------------------------------------------------------------------------------------------------------------------------------------------------------------------------------------------------------------------------------------------------------------------------------------------------------------------------------------------------------------------------------------------------------------------------------------------------------------------------|
| <b>Workshop (Gestation week 26-29)</b>            |                                                                                                                                                                                                                                                                                                                                                                                                                                                                                                                                                                                                                                                                                                                                                                                                                                                                               |
| <b>Transmission teaching component, 1.5 hours</b> |                                                                                                                                                                                                                                                                                                                                                                                                                                                                                                                                                                                                                                                                                                                                                                                                                                                                               |
| <b><i>Instructional design</i></b>                |                                                                                                                                                                                                                                                                                                                                                                                                                                                                                                                                                                                                                                                                                                                                                                                                                                                                               |
| Objectives:                                       | To communicate foundation knowledge about the importance of a healthy prenatal diet for maternal and infant health and the gut.<br>To explain what a healthy diet comprises.<br>To inspire participants to want to act to improve their diet.                                                                                                                                                                                                                                                                                                                                                                                                                                                                                                                                                                                                                                 |
| Learning outcomes:                                | At the end of the workshop, participants should be able to: <ol style="list-style-type: none"> <li>1. Describe the basic effects of healthy and poor eating on the general and mental health outcomes of women and children</li> <li>2. Describe the influence of diet quality on gut microbiota, role of fibre, prebiotic and probiotic-containing foods</li> <li>3. Identify the foods groups in the healthy eating guidelines</li> <li>4. Relate the proportions in which each food group should be consumed</li> <li>5. Reflect on own willingness to change eating behavior</li> </ol>                                                                                                                                                                                                                                                                                   |
| Teaching resource:                                | Scripted presentation                                                                                                                                                                                                                                                                                                                                                                                                                                                                                                                                                                                                                                                                                                                                                                                                                                                         |
| <b><i>Use of Behavior Change Techniques</i></b>   |                                                                                                                                                                                                                                                                                                                                                                                                                                                                                                                                                                                                                                                                                                                                                                                                                                                                               |
| Target Behaviors:                                 | Knowledge building; Motivation to change                                                                                                                                                                                                                                                                                                                                                                                                                                                                                                                                                                                                                                                                                                                                                                                                                                      |
| BCTs [1]:                                         | Framing / reframing (13.2); Reduce negative emotions (11.2); Information about emotional consequences (5.6); Information about health consequences (5.1); Credible sources (9.1)                                                                                                                                                                                                                                                                                                                                                                                                                                                                                                                                                                                                                                                                                              |
| <b>Active learning component, 1.5 hours</b>       |                                                                                                                                                                                                                                                                                                                                                                                                                                                                                                                                                                                                                                                                                                                                                                                                                                                                               |
| <b><i>Instructional design</i></b>                |                                                                                                                                                                                                                                                                                                                                                                                                                                                                                                                                                                                                                                                                                                                                                                                                                                                                               |
| Objective:                                        | To equip participants with practical skills, resources and confidence needed for implementing healthy dietary change at home.                                                                                                                                                                                                                                                                                                                                                                                                                                                                                                                                                                                                                                                                                                                                                 |
| Learning outcomes:                                | At the end of the workshop, participants can: <ol style="list-style-type: none"> <li>6. Outline the steps needed to align own diet with dietary guidelines</li> <li>7. Align the composition of their meal with a take home plate-based guide to assist with meeting the dietary guidelines</li> <li>8. Apply food safety principles throughout pregnancy</li> <li>9. Identify the prebiotic and probiotic-containing foods already consumed</li> <li>10. Augment daily meals and recipes to include prebiotic and probiotic-containing food ingredients</li> <li>11. Problem-solve to overcome social and environmental challenges/ barriers to adopting a healthy diet</li> <li>12. Develop strategies to incorporate high fibre, prebiotic and probiotic foods into daily meals</li> <li>13. Plan shopping list and meals with reference to take home resources</li> </ol> |

|                                                                      |                                                                                                                                                                                                                                                                                                                                                                                                                                                                            |
|----------------------------------------------------------------------|----------------------------------------------------------------------------------------------------------------------------------------------------------------------------------------------------------------------------------------------------------------------------------------------------------------------------------------------------------------------------------------------------------------------------------------------------------------------------|
| Teaching resources:                                                  | so that participants have access to healthy foods and can include foods targeting the gut microbiota<br>Scripted presentation. Take home: Pregnancy plate based guide[2], Nutrition Australia food pyramid [3] and dietary guidelines [4], Prebiotic [5] and probiotic-containing food list, URL to Monash University website for high fibre and prebiotic diet videos, recipes and information [5]                                                                        |
| <b><i>Use of behavior change techniques</i></b>                      |                                                                                                                                                                                                                                                                                                                                                                                                                                                                            |
| Target behaviors:                                                    | Healthy eating; Augmenting meals to include foods for gut health<br>Skill building; Self-efficacy; Overcoming perceived barriers; Problem solving                                                                                                                                                                                                                                                                                                                          |
| BCTs [1]:                                                            | Discrepancy between current behavior and goal standard (1.6); Instruction on how to perform a behavior (4.1); Behavioral rehearsal/practice (8.1); Behavior substitution (8.2); Problem solving/coping planning (1.2); Identification of self as role model (13.1) Social support (general) (3.1); Demonstration of the behavior (6.1); Adding objects to the environment (12.5); Prompts/cues (7.1); Habit formation (8.3); Restructuring the physical environment (12.1) |
| <b>Action planning, 20 minutes</b>                                   |                                                                                                                                                                                                                                                                                                                                                                                                                                                                            |
| <b><i>Instructional design</i></b>                                   |                                                                                                                                                                                                                                                                                                                                                                                                                                                                            |
| Objective                                                            | To ensure that participants have a written behavior change contract with a set of personalised SMART goals to meet for the duration of the study.                                                                                                                                                                                                                                                                                                                          |
| Learning outcomes:                                                   | 14. Set and review own dietary goals                                                                                                                                                                                                                                                                                                                                                                                                                                       |
| Resources:                                                           | Take home resource: Behavior change contract                                                                                                                                                                                                                                                                                                                                                                                                                               |
| <b><i>Use of behavior change techniques</i></b>                      |                                                                                                                                                                                                                                                                                                                                                                                                                                                                            |
| Target behaviors:                                                    | Action planning and goal setting for dietary improvement                                                                                                                                                                                                                                                                                                                                                                                                                   |
| BCTs [1]:                                                            | Goal setting (behavior) (1.1); Behavioral contract (1.8); Action planning (including implementation intentions) (1.4); Commitment (1.9) Non-specific reward (10.3); Self incentive (10.7); Self-reward (10.9)                                                                                                                                                                                                                                                              |
| <b>Morning tea and Lunch, 40 minutes</b>                             |                                                                                                                                                                                                                                                                                                                                                                                                                                                                            |
| Objective:                                                           | To demonstrate how to incorporate foods considered good for gut health into everyday meals.                                                                                                                                                                                                                                                                                                                                                                                |
| Monitor learning outcomes:                                           | 7. Align the composition of their meal with a take home plate-based guide to assist with meeting the dietary guidelines<br>10. Augment daily meals and recipes to include prebiotic and probiotic-containing food ingredients                                                                                                                                                                                                                                              |
| Resources:                                                           | Serving equipment, nuts, seasonal fruits, chopped vegetables, hummus, dip, salad, hard cheese, felafel, rye or wholemeal bread, water                                                                                                                                                                                                                                                                                                                                      |
| <b><i>Use of behavior change techniques</i></b>                      |                                                                                                                                                                                                                                                                                                                                                                                                                                                                            |
| Target behaviors:                                                    | Healthy eating; Augmenting meals to include foods for gut health                                                                                                                                                                                                                                                                                                                                                                                                           |
| BCTs [1]:                                                            | Instruction on how to perform a behavior (4.1); Modelling of the behavior (6.1)                                                                                                                                                                                                                                                                                                                                                                                            |
| <b>Monitoring activities (Gestation weeks 31 and 36), 20 minutes</b> |                                                                                                                                                                                                                                                                                                                                                                                                                                                                            |
| <b><i>Dietary intake questionnaire, 15 minutes</i></b>               |                                                                                                                                                                                                                                                                                                                                                                                                                                                                            |
| Resources:                                                           | Redcap administered online Simple Dietary Questionnaire [6]                                                                                                                                                                                                                                                                                                                                                                                                                |
| <b><i>Use of behavior change techniques</i></b>                      |                                                                                                                                                                                                                                                                                                                                                                                                                                                                            |

|                                                                          |                                                                                                                                                                                                                                                                                                                                                                                                                                                                                                                                                                                                                                                                                                                                                                                                                                                                                                                                                                              |
|--------------------------------------------------------------------------|------------------------------------------------------------------------------------------------------------------------------------------------------------------------------------------------------------------------------------------------------------------------------------------------------------------------------------------------------------------------------------------------------------------------------------------------------------------------------------------------------------------------------------------------------------------------------------------------------------------------------------------------------------------------------------------------------------------------------------------------------------------------------------------------------------------------------------------------------------------------------------------------------------------------------------------------------------------------------|
| Target behavior:<br>BCTs [1]:                                            | Healthy Eating<br>Self-monitoring of behavior (2.3)                                                                                                                                                                                                                                                                                                                                                                                                                                                                                                                                                                                                                                                                                                                                                                                                                                                                                                                          |
| <b>Motivation and readiness to change questionnaire, 5 minutes</b>       |                                                                                                                                                                                                                                                                                                                                                                                                                                                                                                                                                                                                                                                                                                                                                                                                                                                                                                                                                                              |
| Resources:                                                               | Redcap administered online Motivation and Readiness to change questionnaire [7]                                                                                                                                                                                                                                                                                                                                                                                                                                                                                                                                                                                                                                                                                                                                                                                                                                                                                              |
| <b>Use of behavior change techniques</b>                                 |                                                                                                                                                                                                                                                                                                                                                                                                                                                                                                                                                                                                                                                                                                                                                                                                                                                                                                                                                                              |
| Target behavior:<br>BCTs [1]:                                            | Motivation<br>Self-monitoring of behavior (2.3)                                                                                                                                                                                                                                                                                                                                                                                                                                                                                                                                                                                                                                                                                                                                                                                                                                                                                                                              |
| <b>Support telephone call with scripted questions, 10 – 20 minutes</b>   |                                                                                                                                                                                                                                                                                                                                                                                                                                                                                                                                                                                                                                                                                                                                                                                                                                                                                                                                                                              |
| <b>Instructional design</b>                                              |                                                                                                                                                                                                                                                                                                                                                                                                                                                                                                                                                                                                                                                                                                                                                                                                                                                                                                                                                                              |
| Monitoring and feedback for the following learning outcomes (set above): | <ol style="list-style-type: none"> <li>5. Reflect on own willingness to change eating behavior</li> <li>6. Outline the steps needed to align own diet with dietary guidelines</li> <li>7. Align the composition of their meal with a take home plate-based guide to assist with meeting the dietary guidelines</li> <li>9. Identify the prebiotic and probiotic-containing foods consumed</li> <li>10. Augment daily meals and recipes to include prebiotic and probiotic-containing food ingredients</li> <li>11. Problem-solve to overcome social and environmental challenges/barriers to adopting a healthy diet</li> <li>12. Develop strategies to incorporate high fibre, prebiotic and probiotic foods into daily meals</li> <li>13. Plan shopping list and meals with reference to take home resources so that participants have access to healthy foods and can include foods targeting the gut microbiota</li> <li>14. Set and review own dietary goals</li> </ol> |
| Resources:                                                               | Participant: Behavior change contract and workshop take home resources<br>Interviewer: Script for support call                                                                                                                                                                                                                                                                                                                                                                                                                                                                                                                                                                                                                                                                                                                                                                                                                                                               |
| <b>Use of behavior change techniques</b>                                 |                                                                                                                                                                                                                                                                                                                                                                                                                                                                                                                                                                                                                                                                                                                                                                                                                                                                                                                                                                              |
| Target behavior:<br>BCTs [1]:                                            | Healthy eating; self-efficacy; problem solving<br>Review behavior goal(s) (1.5); Self-monitoring of behavior (2.3)<br>Focus on past success (15.3); Goal setting (behavior) (1.1); Problem solving/coping planning (1.2); Commitment (1.9); Behavioral contract (1.8); Discrepancy between current behavior and goal standard (1.6); Restructuring the physical environment (12.1); Social support unspecified (3.1); Social support (practical) (3.2); Feedback on behavior (2.2)                                                                                                                                                                                                                                                                                                                                                                                                                                                                                           |

Numbers within brackets refer BCTs in the Michie et al Behavior Change Technique Taxonomy [1]. BCT, Behavior Change Technique.

## References

- [1] Michie S, Richardson M, Johnston M, Abraham C, Francis J, Hardeman W, Eccles MP, Cane J, Wood CE. The behavior change technique taxonomy (v1) of 93 hierarchically clustered techniques: Building an international consensus for the reporting of behavior change interventions. *Ann Behav Med* 2013;46(1):81–95. PMID:23512568

- [2] Oregon Health & Science University. My Pregnancy Plate [Internet]. Oregon Heal Sci Univ. 2015 [cited 2015 Jul 6]. Available from: <https://www.ohsu.edu/xd/health/services/women/services/other-services/upload/CWH-3051517-Pregnancy-Plate-FLY-WEB.pdf>
- [3] Nutrition Australia. Healthy Eating Pyramid [Internet]. Nutrition Australia; 2015 [cited 2015 Jun 10]. Available from: <http://www.nutritionaustralia.org/national/resource/healthy-eating-pyramid>
- [4] National Health and Medical Research Council. Healthy eating during your pregnancy, advice on eating for you and your baby [Internet]. Canberra: Australian Government, National Health and Medical Research Council; 2013. Available from: [https://www.eatforhealth.gov.au/sites/default/files/content/The Guidelines/n55h\\_healthy\\_eating\\_during\\_pregnancy.pdf](https://www.eatforhealth.gov.au/sites/default/files/content/The%20Guidelines/n55h_healthy_eating_during_pregnancy.pdf)
- [5] Monash Department of Gastroenterology. High fibre, high prebiotic diet for healthy individuals [Internet]. Monash Univ. 2015 [cited 2015 May 1]. Available from: <https://www.monash.edu/medicine/ccs/gastroenterology/prebiotic>
- [6] Parletta N, Zarnowiecki D, Cho J, Wilson A, Bogomolova S, Villani A, Itsiopoulos C, Niyonsenga T, Blunden S, Meyer B, Segal L, Baune BT, O'Dea K. A Mediterranean-style dietary intervention supplemented with fish oil improves diet quality and mental health in people with depression: A randomized controlled trial (HELFIMED). *Nutr Neurosci* 2019; 22(7):474-487. PMID: 29215971
- [7] Skouteris H, McCabe M, Milgrom J, Kent B, Bruce LJ, Mihalopoulos C, Herring SJ, Barnett M, Patterson D, Teale G, Gale J. Protocol for a randomized controlled trial of a specialized health coaching intervention to prevent excessive gestational weight gain and postpartum weight retention in women: the HIPPI study. *BMC Public Health* 2012; 12:78. PMID: 22272935
